# Supplementary material for: Crude Oil Degradation in Temperatures Below the Freezing Point by Bacteria from Hydrocarbon-Contaminated Arctic Soils and the Genome Analysis of Sphingomonas sp. AR_OL41
Source: MDPI journal article supplement (doi:10.3390/microorganisms12010079), 2023-12-30
Supplement: s1 [file s1]

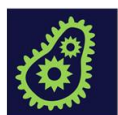

## Supplementary Materials

### Crude Oil Degradation in Temperatures Below the Freezing Point by Bacteria from Hydrocarbon-Contaminated Arctic Soils and the Genome Analysis of *Sphingomonas* sp. AR\_OL41

Ekaterina M. Semenova <sup>1</sup>, Tatyana P. Tourova <sup>1</sup>, Tamara L. Babich <sup>1</sup>, Ekaterina Y. Logvinova <sup>1</sup>, Diyana S. Sokolova <sup>1</sup>, Nataliya G. Loiko <sup>1</sup>, Vladimir A. Myazin <sup>2,3,\*</sup>, Maria V. Korneykova <sup>2,3</sup>, Andrey V. Mardanov <sup>4</sup>, and Tamara N. Nazina <sup>1,\*</sup>

- <sup>1</sup> Winogradsky Institute of Microbiology, Research Center of Biotechnology of the Russian Academy of Sciences, Moscow, 119071, Russia; semenova\_inmi@mail.ru (E.M.S.); tptour@rambler.ru (T.P.T.); microb101@yandex.ru (T.L.B.); logvinovaekaterina@gmail.com (E.Y.L.); sokolovadiyana@gmail.com (D.S.S.); loikonat@mail.ru (N.G.L.); nazina@inmi.ru (T.N.N.)
- <sup>2</sup> Institute of North Industrial Ecology Problems - Subdivision of the Federal Research Centre “Kola Science Centre of Russian Academy of Science”, 184209 Apatity, Russia; v.myazin@ksc.ru (V.A.M.)
- <sup>3</sup> RUDN University, Agrarian and Technological Institute of the People's Friendship University of Russia, Moscow, 117198, Russia; korneykova.maria@mail.ru (M.V.K.)
- <sup>4</sup> Institute of Bioengineering, Research Center of Biotechnology of the Russian Academy of Sciences, Moscow 119071, Russia; mardanov@biengi.ac.ru (A.V.M.)
- \* Correspondence: nazina@inmi.ru, Tel.: +7-499-135-0341 (T.N.N.); v.myazin@ksc.ru, Tel.: +7-815-557-97-71 (V.A.M.)

#### **This file includes:**

Figures S1 to S8

Tables S1 to S3

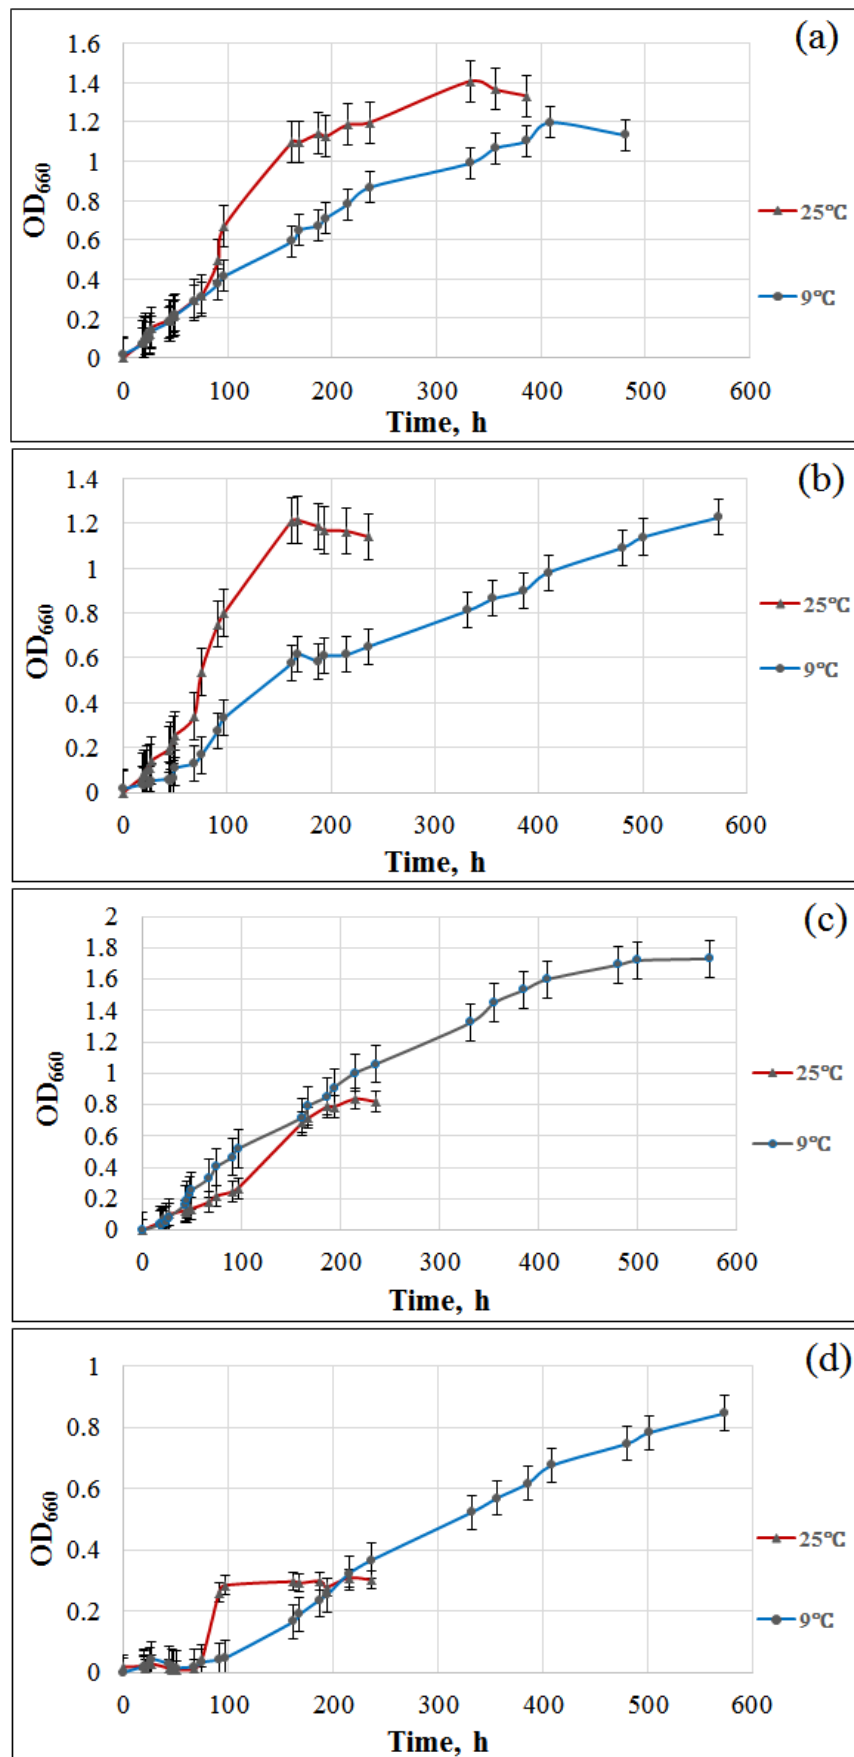

**Figure S1.** Growth curves of the strains *Pseudomonas frederiksbergensis* Ar-K7 (a), *Rhodococcus yunnanensis* Ar-K9 (b), *Arthrobacter alpinus* Ar-K10 (c), and *Sphingomonas* sp. AR\_OL41 (d) in the TEG liquid medium at 9 °C and 25 °C.

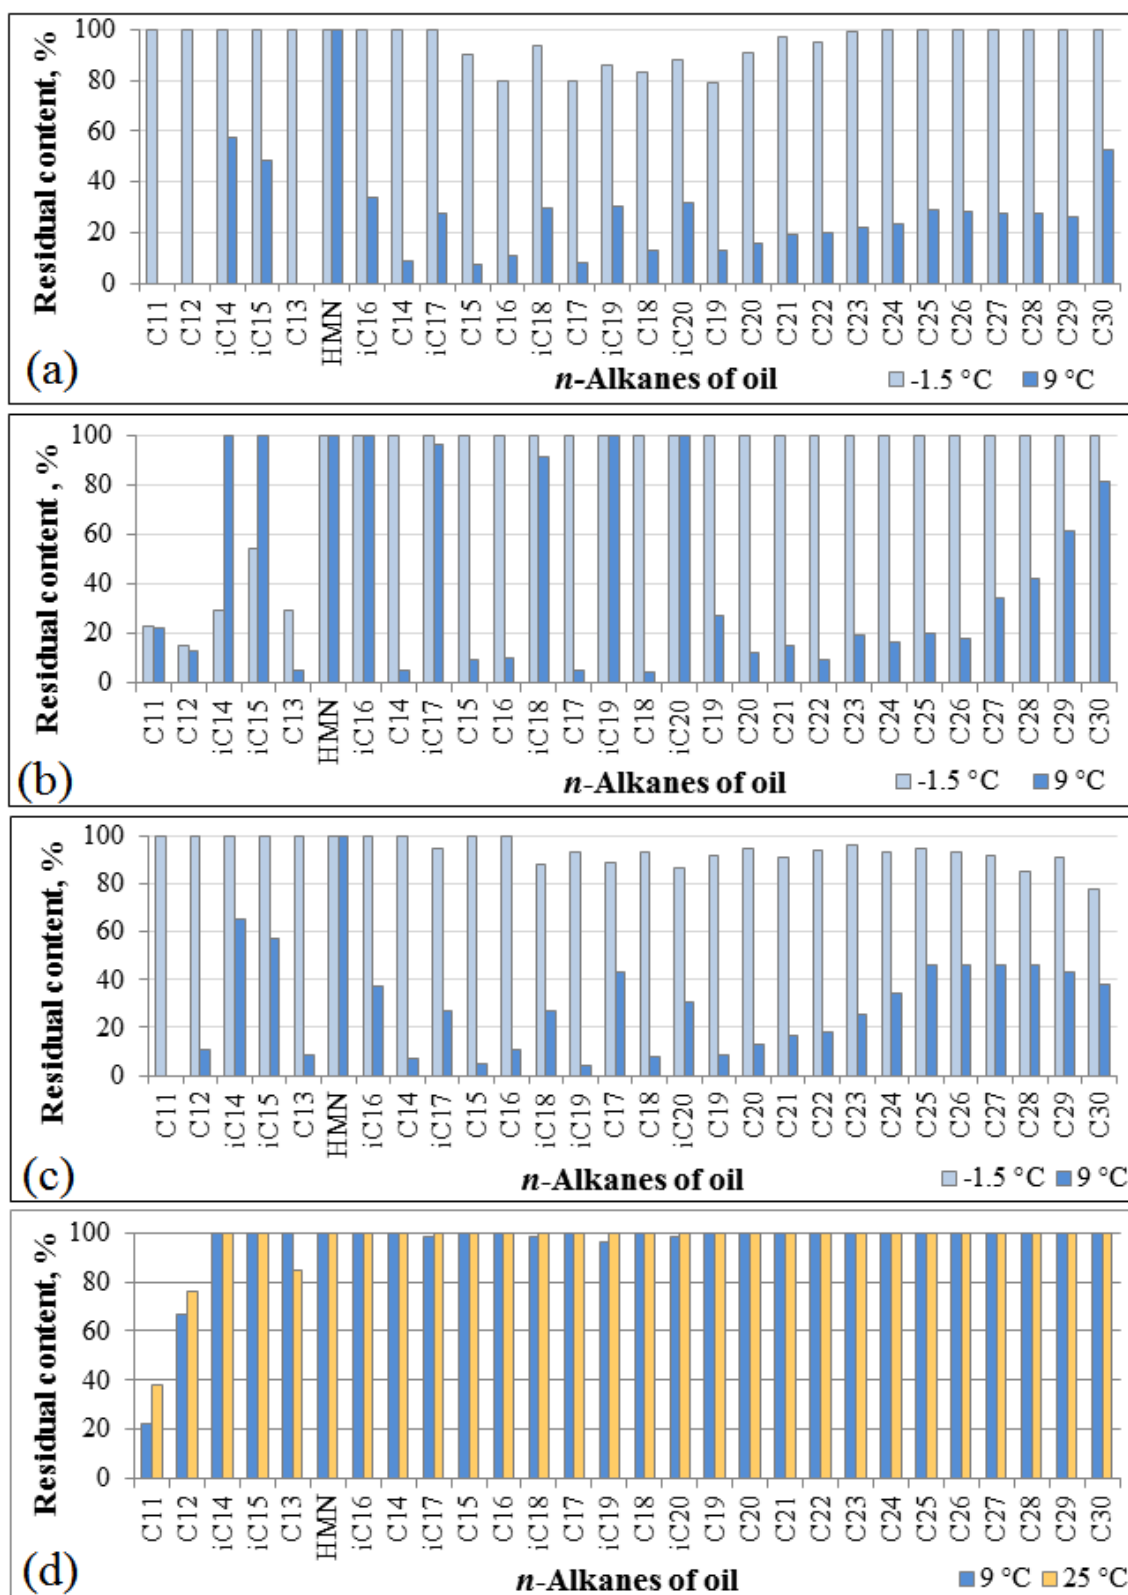

**Figure S2.** Residual content of *n*-alkanes in crude oil biodegraded by *Pseudomonas frederiksbergensis* Ar-K7 (a), *Rhodococcus yunnanensis* Ar-K9 (b), *Arthrobacter alpinus* Ar-K10 (c), and *Sphingomonas* sp. AR\_OL41 (d) at -1.5 °C, 9 °C, and 25 °C.

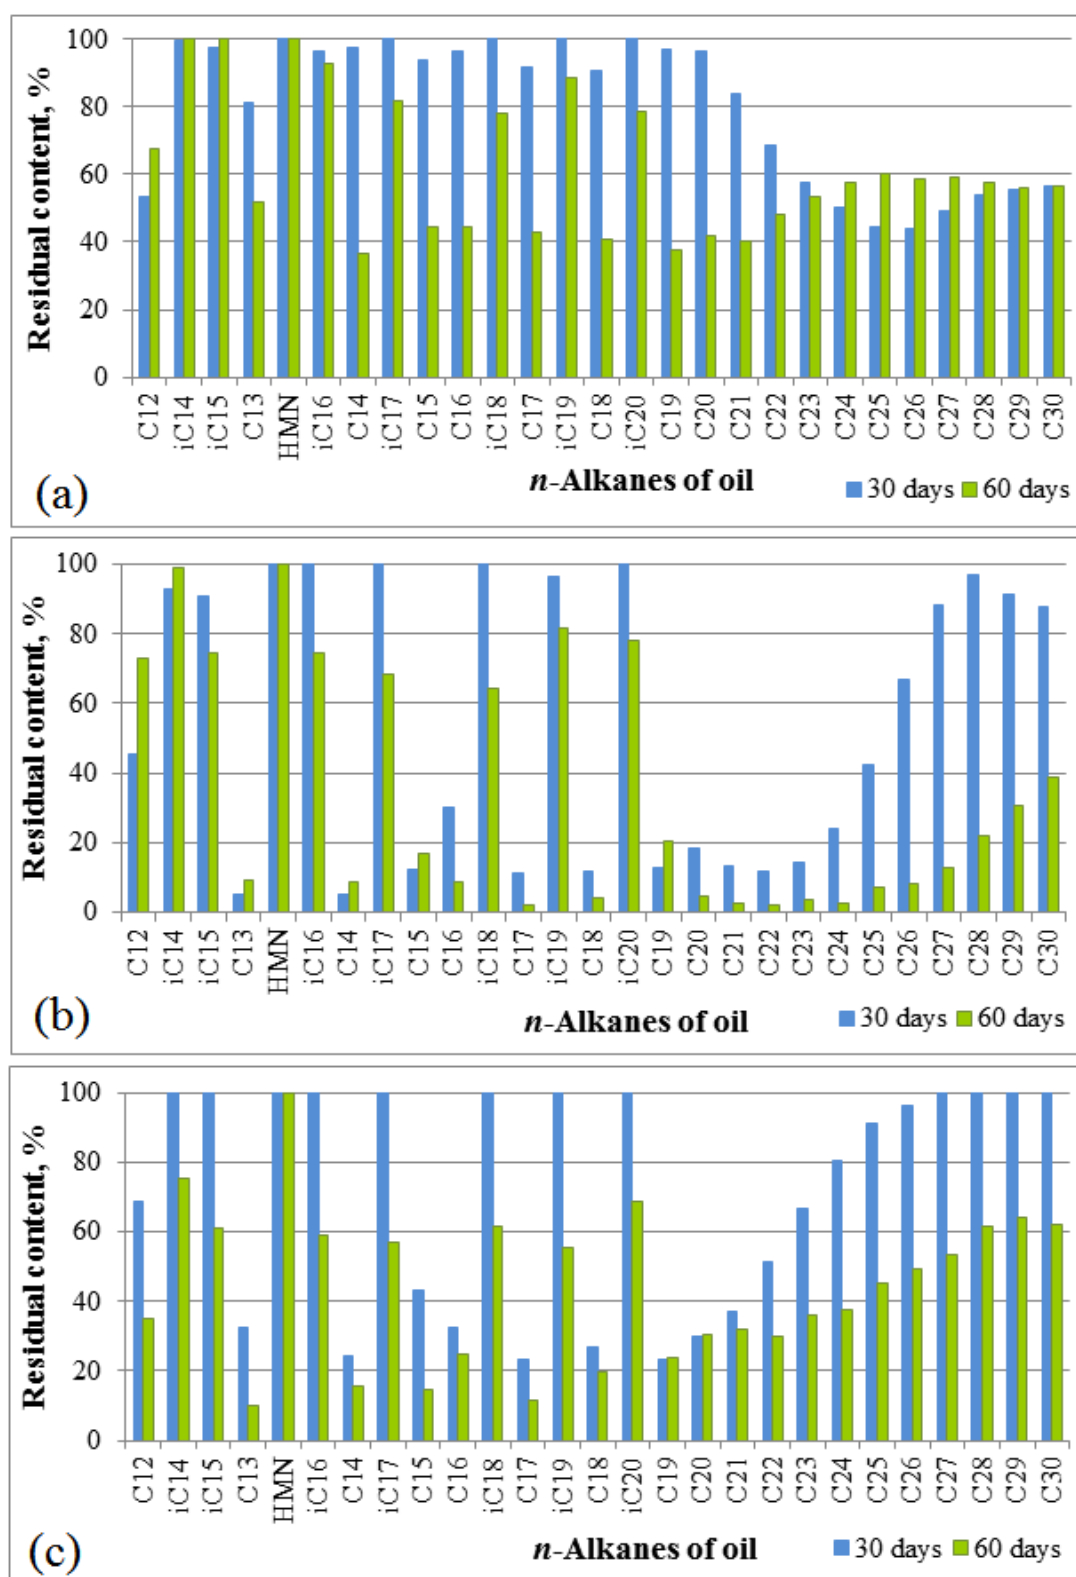

**Figure S3.** Residual content of *n*-alkanes (%) in crude oil biodegraded by *Pseudomonas frederiksbergensis* Ar-K7 (a), *Rhodococcus yunnanensis* Ar-K9 (b), and *Arthrobacter alpinus* Ar-K10 (c) during remediation of polluted sand.

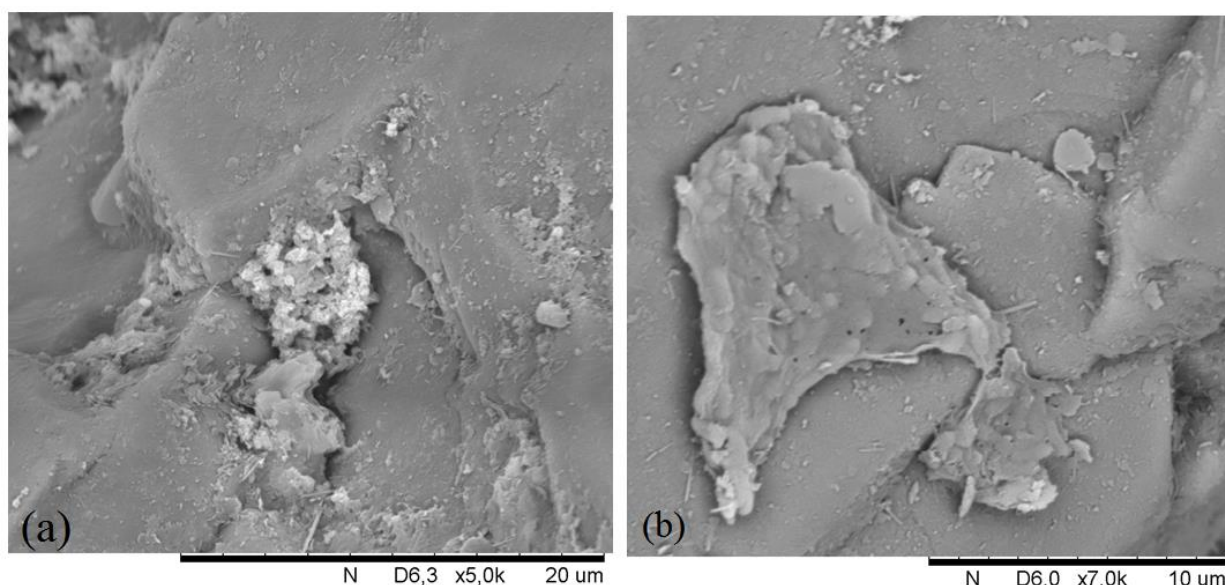

**Figure S4.** Scanning electron micrographs of biofilms of the strains *Pseudomonas frederiksbergensis* Ar-K7 (a) and *Rhodococcus yunnanensis* Ar-K9 (b) after 30 days of cultivation on oil-contaminated sand. The samples were examined under a scanning electron microscope TM3000 (Hitachi, Tokyo, Japan) with accelerating voltage 15 kV.

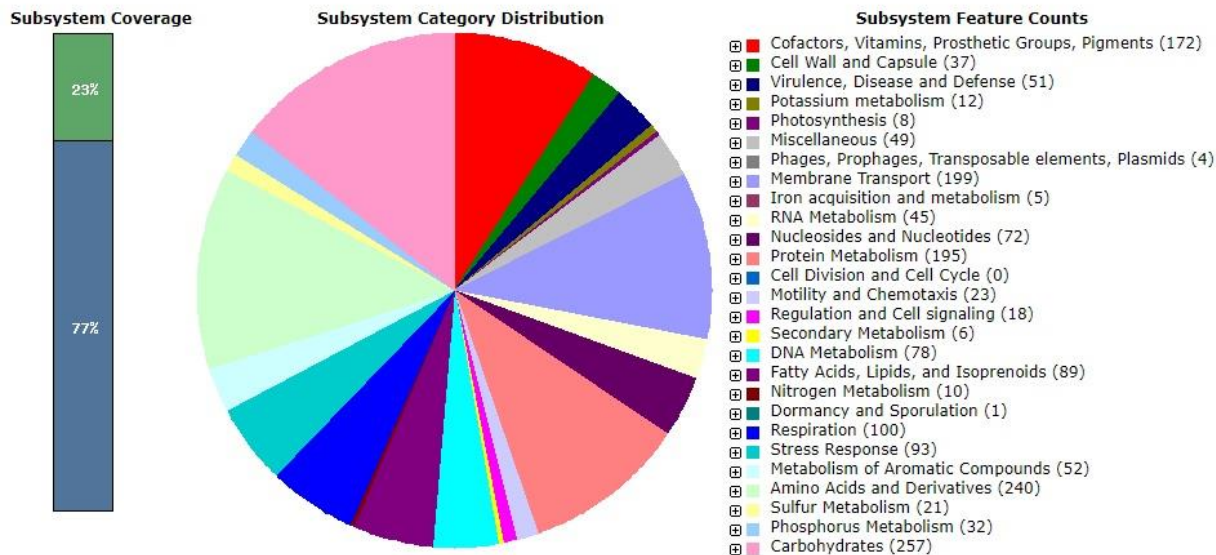

**Figure S5.** Subsystems of *Sphingomonas* sp. AR\_OL41 based on RAST database.



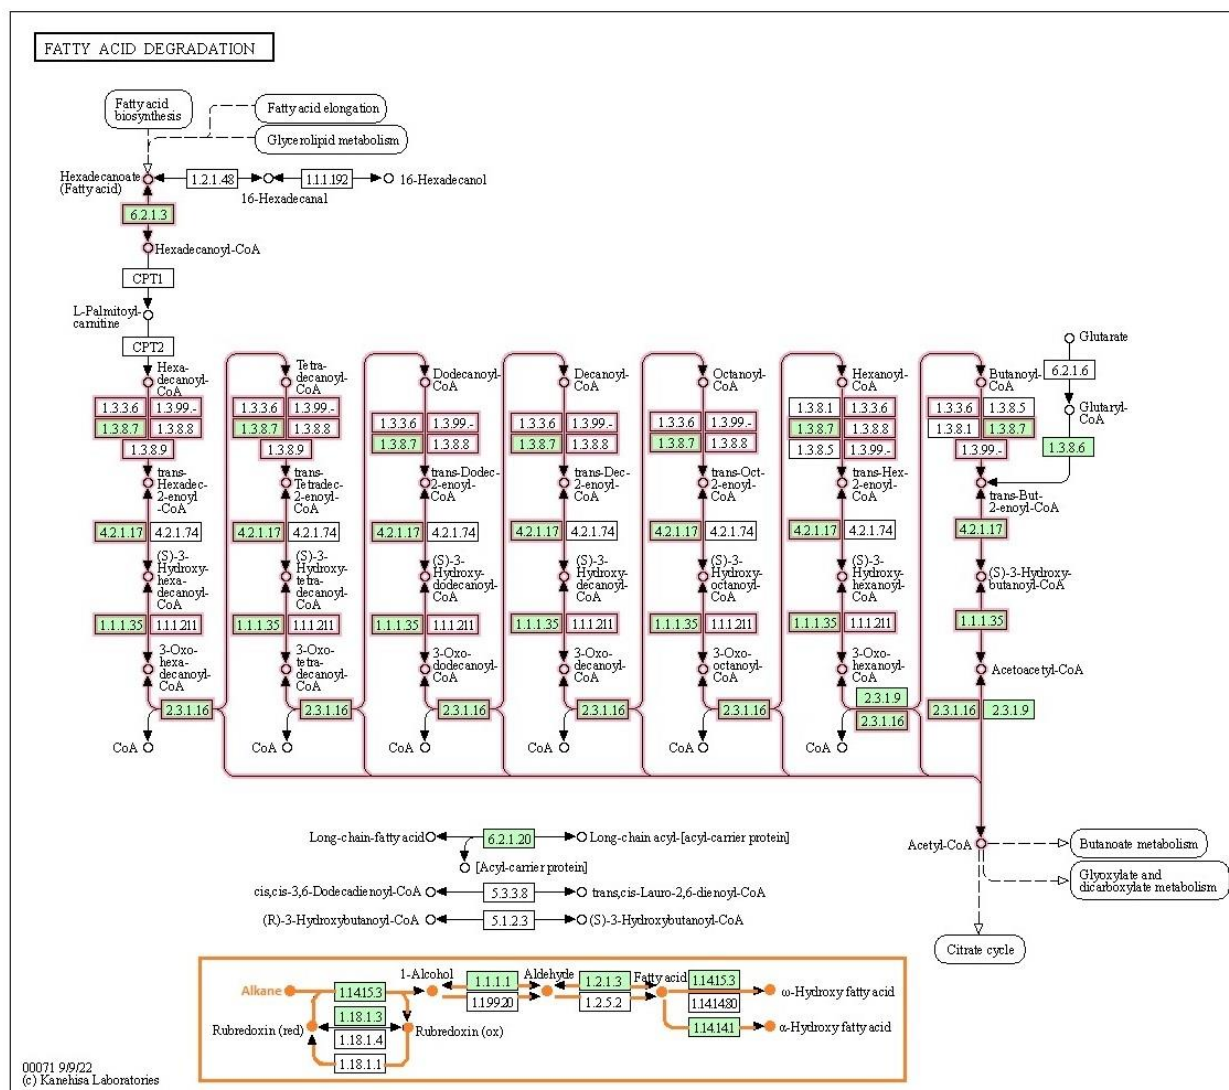

**Figure S7.** KEGG-map of degradation of fatty acids and *n*-alkanes (id 00071) based on genome analysis of the strain *Spingomonas* sp. AR\_OL41.

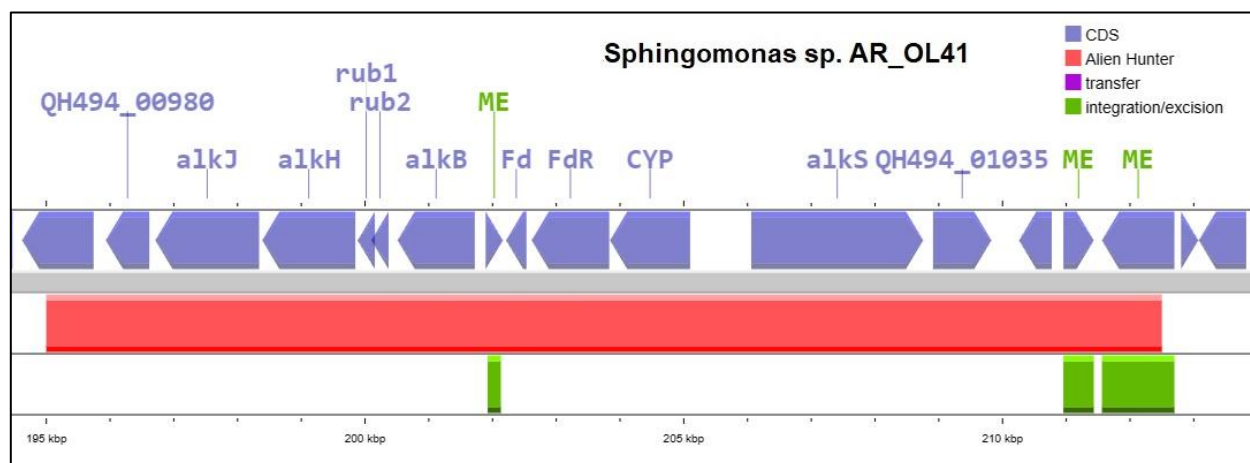

**Figure S8.** Localization of *n*-alkane degradation genes on the graphic map of the circular chromosome of the strain *Sphingomonas* sp. AR\_OL41. The genes of mobile elements (ME) are highlighted in green. Designations: *alkB* – alkane-1 monooxygenase; *rub* – rubredoxin; *alkH* – aldehyde dehydrogenase; *alkJ* – alcohol dehydrogenase; Fd – ferredoxin; FdR – ferredoxin reductase; CYP – presumably cytochrome P450; *alkS* – transcriptional regulator; ME – proteins of mobile elements.

**Table S1.** Phenotypic characteristics of hydrocarbon-oxidizing bacteria *Pseudomonas frederiksbergensis* Ar-K7, *Rhodococcus yunnanensis* Ar-K9, *Arthrobacter alpinus* Ar-K10, and *Sphingomonas* sp. AR\_OL41.

| Characteristic                      | <i>Pseudomonas<br/>frederiksbergensis</i><br>Ar-K7 | <i>Rhodococcus<br/>yunnanensis</i><br>Ar-K9 | <i>Arthrobacter<br/>alpinus</i><br>Ar-K10 | <i>Sphingomonas</i><br>sp.<br>AR_OL41 |
|-------------------------------------|----------------------------------------------------|---------------------------------------------|-------------------------------------------|---------------------------------------|
| Temperature range/<br>optimum, °C   | −1.5...25/5                                        | 5...25/ 5–15                                | −1.5...25/<br>10–25                       | 9...25/20–25                          |
| NaCl range/optimum, % <i>w/v</i>    | 0–1.5/0.2                                          | 0–4/0.5                                     | 0–6/0–4                                   | 0–1.5/0                               |
| API® ZYM tests:                     |                                                    |                                             |                                           |                                       |
| Alkaline phosphatase                | +                                                  | +                                           | +                                         | +                                     |
| Esterase (C4)                       | +                                                  | W                                           | +                                         | +                                     |
| Esterase lipase (C8)                | +                                                  | +                                           | +                                         | +                                     |
| Lipase (C14)                        | +                                                  | +                                           | W                                         | –                                     |
| Leucine arylamidase                 | +                                                  | +                                           | +                                         | +                                     |
| Valine arylamidase                  | +                                                  | +                                           | +                                         | +                                     |
| Cystine arylamidase                 | +                                                  | +                                           | +                                         | +                                     |
| Trypsin                             | –                                                  | +                                           | +                                         | –                                     |
| α-Chymotrypsin                      | –                                                  | +                                           | +                                         | –                                     |
| Acid phosphatase                    | +                                                  | +                                           | +                                         | +                                     |
| Naphthol-AS-BI-<br>phosphohydrolase | +                                                  | +                                           | +                                         | +                                     |
| α-Galactosidase                     | –                                                  | –                                           | +                                         | –                                     |
| β-Galactosidase                     | –                                                  | –                                           | +                                         | –                                     |
| β-Glucuronidase                     | –                                                  | –                                           | +                                         | +                                     |
| α-Glucosidase                       | –                                                  | –                                           | +                                         | +                                     |
| β-Glucosidase                       | –                                                  | +                                           | +                                         | +                                     |
| α-Mannosidase                       | –                                                  | –                                           | +                                         | –                                     |
| API® 20E tests:                     |                                                    |                                             |                                           |                                       |
| β-Galactosidase                     | –                                                  | –                                           | +                                         | –                                     |
| Arginine dihydrolase                | +                                                  | –                                           | –                                         | –                                     |
| Citrate utilization                 | +                                                  | –                                           | +                                         | –                                     |
| Acid from glucose                   | +                                                  | +                                           | –                                         | –                                     |
| Xylan                               | +                                                  | –                                           | –                                         | +                                     |
| Chitin                              | +                                                  | +                                           | +                                         | +                                     |
| Catalase                            | +                                                  | +                                           | +                                         | +                                     |
| Oxidase                             | +                                                  | –                                           | –                                         | +                                     |

Results of the API® 20E tests for all studied strains were negative for lysine decarboxylase, ornithine decarboxylase, H<sub>2</sub>S production, urease, tryptophane deaminase, indole production, acetoin production (Voges Proskauer), and gelatinase. In the API® ZYM tests, all four studied strains were negative for N-acetyl-β-glucosaminidase and α-fucosidase.

**Table S2.** Physiological growth parameters of *Pseudomonas frederiksbergensis* Ar-K7, *Rhodococcus yunnanensis* Ar-K9, and *Arthrobacter alpinus* Ar-K10 on oil-contaminated sand.

| Sample                       | 0 days                     |                                    | 30 days                    |                                    |     |                                 | 60 days                    |                                    |     |                                 | Oil decrease, mg/100 g of sand |
|------------------------------|----------------------------|------------------------------------|----------------------------|------------------------------------|-----|---------------------------------|----------------------------|------------------------------------|-----|---------------------------------|--------------------------------|
|                              | Cells number per g of sand | Biofilm density, OD <sub>540</sub> | Cells number per g of sand | Biofilm density, OD <sub>540</sub> | pH  | Acetate/ ethanol, mg/kg of sand | Cells number per g of sand | Biofilm density, OD <sub>540</sub> | pH  | Acetate/ ethanol, mg/kg of sand |                                |
| Ar-K7 (Control without oil)  | 10 <sup>7</sup>            | -                                  | 10 <sup>7</sup>            | 0.32                               | 7.7 | 81.6 / 11.0                     | 10 <sup>8</sup>            | 0.24                               | 8.1 | 20.0 / 0.8                      | -                              |
| Ar-K7                        | 10 <sup>8</sup>            | 0.12                               | 10 <sup>7</sup>            | 0.35                               | 7.7 | 22.1 / 5.1                      | 10 <sup>7</sup>            | 0.70                               | 8.0 | 12.5 / 1.9                      | 87±13                          |
| Ar-K9 (Control without oil)  | 10 <sup>3</sup>            | -                                  | 0                          | 0.15                               | 7.8 | 19.4 / 5.7                      | 0                          | 0.14                               | 7.8 | 23.0 / 6.4                      | -                              |
| Ar-K9                        | 10 <sup>3</sup>            | 0.14                               | 10 <sup>6</sup>            | 0.64                               | 7.7 | 15.6 / 6.5                      | 10 <sup>7</sup>            | 0.56                               | 7.8 | 6.8 / 2.0                       | 37±6                           |
| Ar-K10 (Control without oil) | 10 <sup>7</sup>            | -                                  | 10 <sup>6</sup>            | 0.20                               | 7.8 | 18.1 / 5.3                      | 10 <sup>6</sup>            | 0.14                               | 7.8 | 8.1 / 0.7                       | -                              |
| Ar-K10                       | 10 <sup>7</sup>            | 0.13                               | 10 <sup>7</sup>            | 0.30                               | 7.8 | 34.9 / 6.0                      | 10 <sup>7</sup>            | 0.48                               | 7.9 | 11.0 / 1.0                      | 70±11                          |

**Table S3.** Genes implicated in the adaptation to cold environments in the genome of *Sphingomonas* sp. AR\_OL41.

| Functional classification          | Protein name                                                                                       | Gene Symbol | No. of genes | RefSeq Locus Tag |
|------------------------------------|----------------------------------------------------------------------------------------------------|-------------|--------------|------------------|
| DNA replication                    | DNA gyrase subunit A (EC: 5.99.1.3)                                                                | <i>gyrA</i> | 1            | QH494_18230      |
|                                    | RecA protein                                                                                       | <i>gecA</i> | 1            | QH494_01255      |
|                                    | Chromosomal replication initiator protein DnaA                                                     | <i>dnaA</i> | 1            | QH494_20750      |
| Nucleoid protein; DNA supercoiling | DNA-binding protein HU-beta                                                                        |             | 2            | QH494_00455      |
|                                    |                                                                                                    |             |              | QH494_08860      |
| RNA chaperones                     | Cold shock protein, CspA family                                                                    |             | 5            | QH494_04405      |
|                                    |                                                                                                    |             |              | QH494_09435      |
|                                    |                                                                                                    |             |              | QH494_14005      |
|                                    |                                                                                                    |             |              | QH494_17445      |
|                                    |                                                                                                    |             |              | QH494_25730      |
| Protein folding                    | Chaperone protein DnaK                                                                             | <i>dnaK</i> | 2            | QH494_12850      |
|                                    |                                                                                                    |             |              | QH494_14160      |
|                                    | Chaperone protein DnaJ                                                                             | <i>dnaJ</i> | 1            | QH494_12855      |
|                                    | Peptidyl-prolyl cis-trans isomerase (EC: 5.2.1.8)                                                  |             | 3            | QH494_11325      |
| Protein biosynthesis               | Translation initiation factor 1                                                                    | <i>infA</i> | 1            | QH494_24975      |
|                                    | Ribosome-binding factor A                                                                          | <i>rbfA</i> | 1            | QH494_27105      |
| Unsaturation of membrane lipids    | Fatty acid desaturase, type 2<br>Delta-9 fatty acid desaturase (EC: 1.14.19.1)                     |             | 2            | QH494_04100      |
|                                    |                                                                                                    |             | 3            | QH494_17510      |
|                                    |                                                                                                    |             |              | QH494_24800      |
|                                    |                                                                                                    |             |              | QH494_25035      |
| Clustering-based subsystems        | Exopolysaccharide biosynthesis protein                                                             |             | 1            | QH494_20245      |
| Pyruvate metabolism II             | Pyruvate dehydrogenase E1 component alpha subunit (EC: 1.2.4.1)                                    | <i>pdhA</i> | 2            | QH494_02965      |
|                                    |                                                                                                    |             |              | QH494_02965      |
|                                    | Pyruvate dehydrogenase E1 component beta subunit (EC: 1.2.4.1)                                     | <i>pdhB</i> | 2            | QH494_02960      |
|                                    |                                                                                                    |             |              | QH494_02960      |
|                                    | Pyruvate dehydrogenase E2 component (dihydrolipoyllysine-residue acetyltransferase) (EC: 2.3.1.12) | <i>pdhC</i> | 1            | QH494_06455      |
